# Supplementary material for: Early Antibiotic Exposure and Bronchopulmonary Dysplasia in Very Preterm Infants at Low Risk of Early-Onset Sepsis
Source: PubMed Central journal article supplement (PMC11211957; doi:10.1001/jamanetworkopen.2024.18831), 2024-06-27
Supplement: jamanetwopen-e2418831-s001.pdf [file jamanetwopen-e2418831-s001.pdf]

## Supplemental Online Content

Shi W, Chen Z, Shi L, et al. Early antibiotic exposure and bronchopulmonary dysplasia in very preterm infants at low risk of early-onset sepsis. *JAMA Netw. Open.* 2024;7(6):e2418831. doi:10.1001/jamanetworkopen.2024.18831

**eTable 1.** Antibiotic Characteristics

**eFigure 1.** Variation in the Proportion of Infants With Prolonged Antibiotics Exposure (5 – 7 days) by CHNN Centers

**eFigure 2.** Characteristics of Antibiotic Regimen

**eTable 2.** Sensitivity Analysis After the Center Effect Was Adjusted

**eFigure 3.** Sensitivity Analysis According to the Different Classification Criteria

**eTable 4.** Baseline Characteristics of Different Durations of Early Antibiotic Exposure Groups in the Propensity Score Matched Sample

**eTable 4.** Sensitivity Analysis of Different Durations of Early Antibiotic Exposure in the Propensity Score Matched Sample

**eTable 5.** Baseline Characteristics of Different Durations of Initial Antibiotic Therapy Groups (Starting <72 Hours of Age) in the Propensity Score Matched Sample

**eTable 6.** Sensitivity Analysis of Different Durations of Initial Antibiotic Therapy (Starting <72 Hours of Age) in the Propensity Score Matched Sample

**eTable 7.** Baseline Characteristics of Different Durations of Early Antibiotic Exposure in the Propensity Score Matched Sample With Imputation of Missing Data for Magnesium Sulfate During Delivery Admission

**eTable 8.** Sensitivity Analysis of Different Durations of Early Antibiotic Exposure in the Propensity Score Matched Sample With Imputation of Missing Data for Magnesium Sulfate During Delivery Admission

**eTable 9.** Baseline Characteristics of Participants in the Top 14 Centers That Implemented Relatively Stricter Criteria for Antibiotic Therapy

**eTable 10.** Sensitivity Analysis According to the Proportion of Infants With Prolonged Antibiotic Exposure

**eFigure 4.** Stratified Analysis for Effects of Broad-Spectrum or Narrow-Spectrum Antibiotics Varied by the Duration of Antibiotics Exposure

This supplemental material has been provided by the authors to give readers additional information about their work.

**eTable 1.** Antibiotic Characteristics

| Antibiotics characteristics                    | Early Antibiotic Exposure |                   |
|------------------------------------------------|---------------------------|-------------------|
|                                                | 1-4 Days (N=1134)         | 5-7 Days (N=4052) |
| <b>Broad-spectrum antibiotics, n (%)</b>       | 698 (61.6)                | 3400 (83.9)       |
| Extended Spectrum Penicillin + $\beta$ -       | 311 (27.4)                | 1358 (33.5)       |
| Third-generation cephalosporins                | 411 (36.2)                | 2293 (56.6)       |
| Fourth-generation cephalosporins               | 14 (1.2)                  | 28 (0.7)          |
| Carbapenems                                    | 31 (2.7)                  | 478 (11.8)        |
| Linezolid                                      | 0 (0.0)                   | 4 (0.1)           |
| Vancomycin                                     | 10 (0.9)                  | 64 (1.6)          |
| <b>Narrow-spectrum antibiotic, n (%)</b>       | 353 (31.1)                | 535 (13.2)        |
| Penicillin/ Penicillinase-Resistant Penicillin | 548 (48.3)                | 1856 (45.8)       |
| First-generation cephalosporins                | 12 (1.1)                  | 11 (0.3)          |
| Second-generation cephalosporins               | 45 (4.0)                  | 209 (5.2)         |
| <b>Others, n (%)</b>                           | 83 (7.3)                  | 117 (2.9)         |

**eFigure 1.** Variation in the Proportion of Infants with Prolonged Antibiotics Exposure (5-7 days) by CHNN Centers

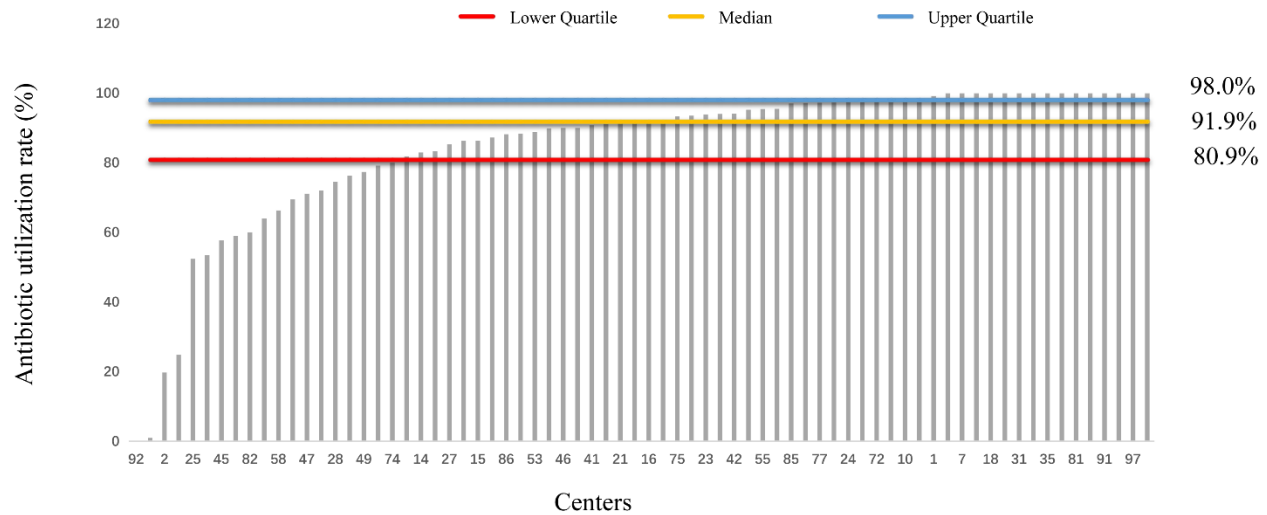

**eFigure 2. Characteristics of Antibiotic Regimen**

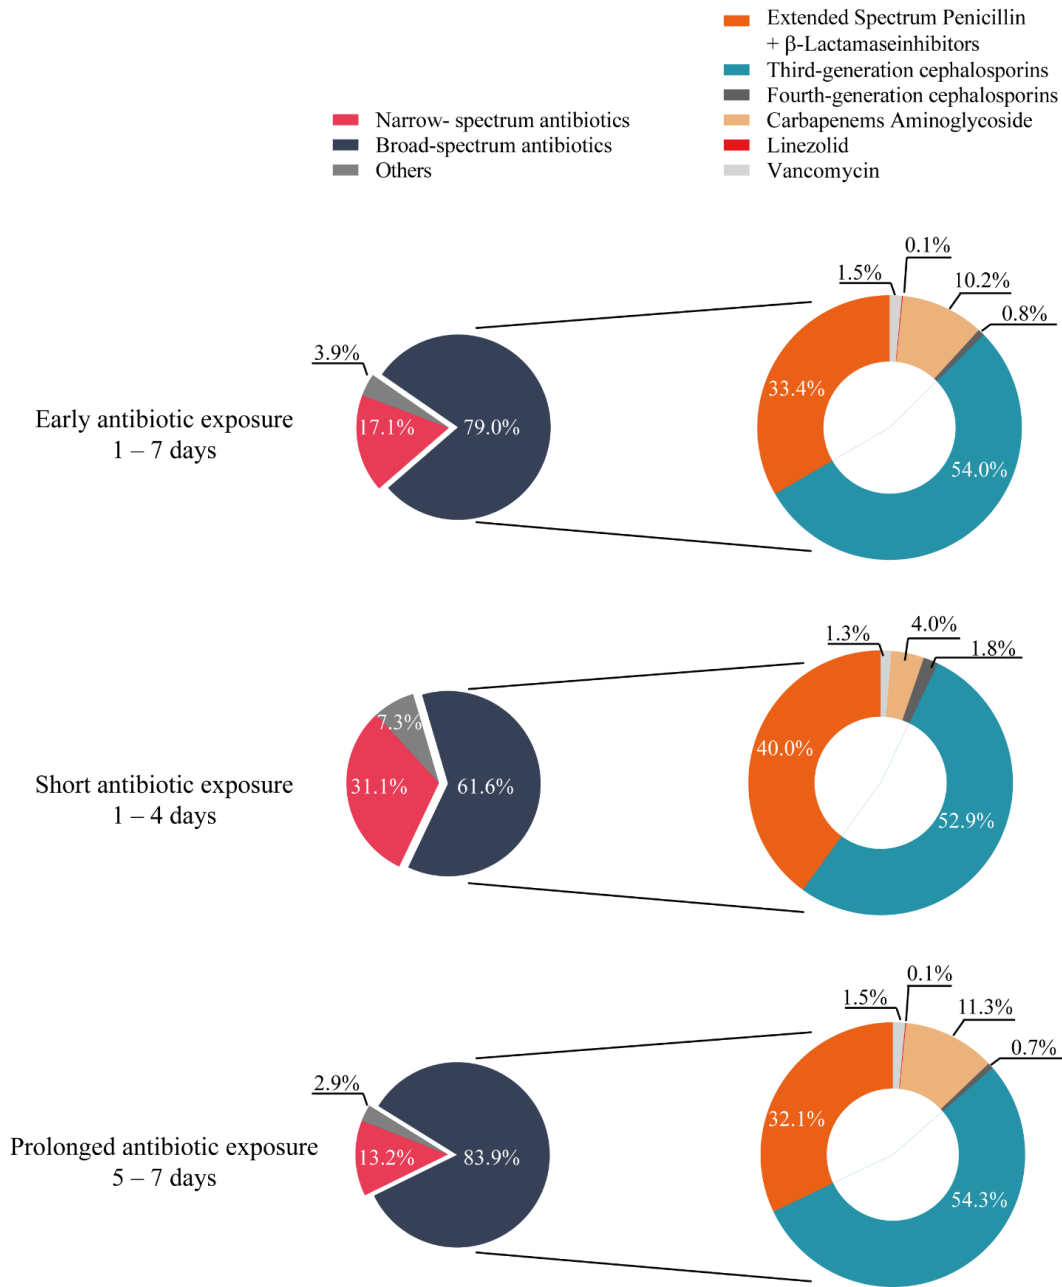

The utilization proportion of broad-spectrum antibiotics was significantly higher than that of narrow-spectrum antibiotics across different antibiotic exposure groups: early antibiotic exposure (1-7 days), short-term exposure (1-4 days) and prolonged exposure (5-7 days). Among broad-spectrum antibiotics, third-generation cephalosporins and extend spectrum penicillin with β-Lactamase inhibitors were most commonly administered.

**eTable 2.** Sensitivity Analysis after the Center Effect was Adjusted

| Outcomes                                        | aOR (95% CI) Model 3 |                   |                          |
|-------------------------------------------------|----------------------|-------------------|--------------------------|
|                                                 | 1–4 d VS None        | 5–7 d VS None     | 5–7 d VS 1-4 d           |
| Moderate to severe BPD or death                 | 0.88 (0.67, 1.16)    | 1.23 (0.85, 1.78) | <b>1.40 (1.04, 1.89)</b> |
| Moderate to severe BPD in survivors at 36wk PMA | 0.85 (0.63, 1.15)    | 1.19 (0.81, 1.76) | <b>1.40 (1.02, 1.92)</b> |
| Death prior to 36wk PMA                         | 1.61 (0.82, 3.17)    | 1.73 (0.90, 3.34) | 1.12 (0.72, 1.72)        |
| Death before hospital discharge                 | 1.28 (0.68, 2.40)    | 1.59 (0.83, 3.05) | 1.24 (0.79, 1.95)        |

Abbreviations: PMA, postmenstrual age; BPD, bronchopulmonary dysplasia.

Generalized estimating equation models were used to adjusted for the center cluster effect. In model 3, GA, BW, SGA, sex, multiple pregnancy, maternal age, gestational diabetes, gestational hypertension or pre/eclampsia, antenatal corticosteroids use, magnesium sulfate use, Apgar score, intubation in delivery room, treatment with surfactant, NO, PDA requiring pharmacological treatment, mechanical ventilation treatment in 7 days after birth, and centers were adjusted. aOR (95% CI) was presented.

**eFigure 3. Sensitivity Analysis According to the Different Classification Criteria**

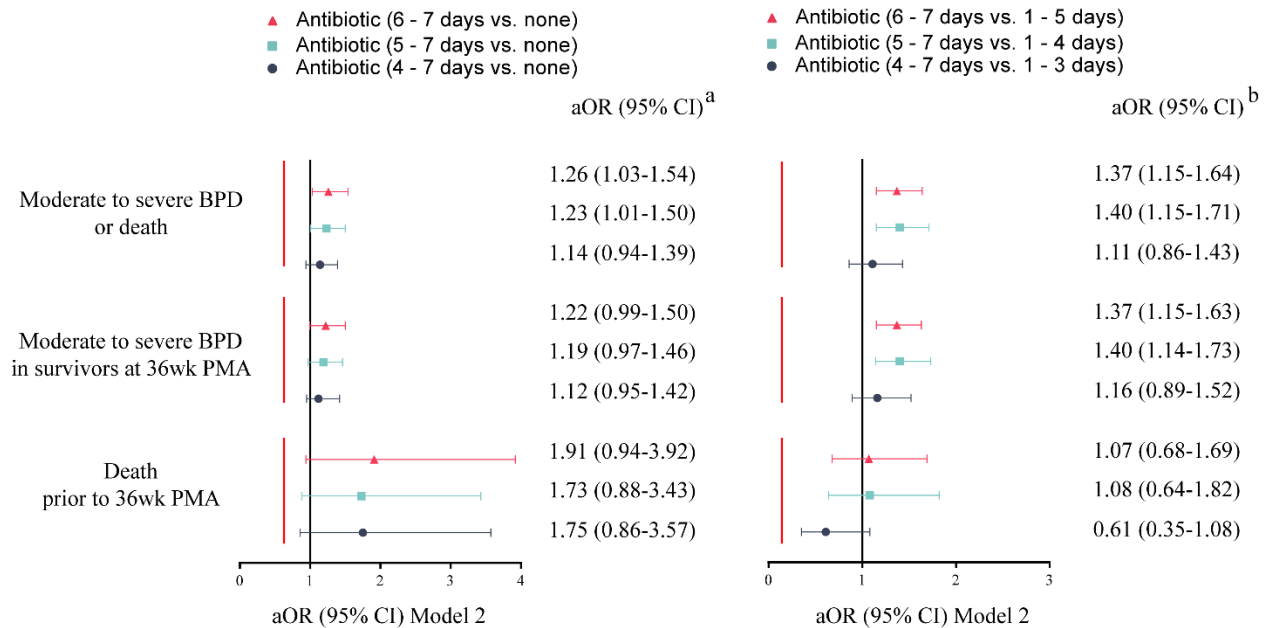

Abbreviations: PMA, postmenstrual age; BPD, bronchopulmonary dysplasia.

Three different cut-offs (3, 4, 5 calendar days) were used to define short and prolonged antibiotic exposure. Logistic regression model 2 was used to analyze the association between the prolonged antibiotic exposure and adverse outcomes. In model 2, GA, BW, SGA, sex, multiple pregnancy, maternal age, gestational diabetes, gestational hypertension or pre/eclampsia, antenatal corticosteroids use, magnesium sulfate use, Apgar score, intubation in delivery room, treatment with surfactant, NO, PDA requiring pharmacological treatment, and mechanical ventilation treatment in 7 days after birth were adjusted. aOR (95% CI) was presented.

<sup>a</sup> Reference is none antibiotic exposure.

<sup>b</sup> Reference is short-term antibiotic exposure.

**eTable 3.** Baseline Characteristics of Different Durations of Early Antibiotic Exposure Groups in the Propensity Score Matched Sample

| Variables                                              | Early Antibiotic Exposure |                 | Absolute standardized mean difference | Early Antibiotic Exposure |                  | Absolute standardized mean difference | Early Antibiotic Exposure |                 | Absolute standardized mean difference |
|--------------------------------------------------------|---------------------------|-----------------|---------------------------------------|---------------------------|------------------|---------------------------------------|---------------------------|-----------------|---------------------------------------|
|                                                        | None (N=833)              | 1-4days (N=833) |                                       | None (N=1168)             | 5-7days (N=1168) |                                       | 1-4days (N=988)           | 5-7days (N=988) |                                       |
| <b>Maternal characteristics, n(%)</b>                  |                           |                 |                                       |                           |                  |                                       |                           |                 |                                       |
| Maternal age ≥35 y                                     | 205 (24.6)                | 173 (20.8)      | 0.093                                 | 280 (24.0)                | 357 (30.6)       | 0.151                                 | 213 (21.6)                | 207 (21.0)      | 0.015                                 |
| Multiple pregnancy                                     | 262 (31.5)                | 260 (31.2)      | 0.005                                 | 372 (31.9)                | 352 (30.1)       | 0.038                                 | 320 (32.4)                | 295 (29.9)      | 0.054                                 |
| Gestational diabetes                                   | 159 (19.1)                | 161 (19.3)      | 0.006                                 | 218 (18.7)                | 246 (21.1)       | 0.060                                 | 192 (19.4)                | 182 (18.4)      | 0.026                                 |
| Antenatal corticosteroids                              | 701 (84.2)                | 689 (82.7)      | 0.038                                 | 973 (83.3)                | 840 (72.0)       | 0.282                                 | 819 (82.9)                | 828 (83.8)      | 0.024                                 |
| Gestational hypertension or Pre/eclampsia              | 406 (48.7)                | 406 (48.7)      | 0.000                                 | 618 (52.9)                | 628 (53.8)       | 0.017                                 | 446 (45.1)                | 440 (44.5)      | 0.012                                 |
| Magnesium sulfate during delivery admission            | 510 (61.2)                | 514 (61.7)      | 0.010                                 | 723 (61.9)                | 638 (54.6)       | 0.147                                 | 605 (61.2)                | 590 (59.7)      | 0.031                                 |
| <b>Neonatal characteristics, n(%)</b>                  |                           |                 |                                       |                           |                  |                                       |                           |                 |                                       |
| Birth weight                                           |                           |                 |                                       |                           |                  |                                       |                           |                 |                                       |
| <1000g                                                 | 69 (8.3)                  | 84 (10.1)       | 0.059                                 | 83 (7.1)                  | 149 (12.8)       | 0.159                                 | 103 (10.4)                | 87 (8.8)        | 0.053                                 |
| ≥1000g                                                 | 764 (91.7)                | 749 (89.9)      |                                       | 1085 (92.9)               | 1046 (89.5)      |                                       | 885 (89.6)                | 901 (91.2)      |                                       |
| Gestational age, week                                  |                           |                 |                                       |                           |                  |                                       |                           |                 |                                       |
| <28                                                    | 25 (3.0)                  | 34 (4.1)        | 0.050                                 | 26 (2.2)                  | 47 (4.0)         | 0.077                                 | 49 (5.0)                  | 42 (4.3)        | 0.033                                 |
| ≥28                                                    | 808 (97.0)                | 799 (95.9)      |                                       | 1142 (97.8)               | 1121 (96.0)      |                                       | 939 (95.0)                | 946 (95.7)      |                                       |
| SGA                                                    | 273 (32.8)                | 272 (32.7)      | 0.003                                 | 483 (41.4)                | 453 (38.8)       | 0.057                                 | 289 (29.3)                | 275 (27.8)      | 0.031                                 |
| Male sex                                               | 397 (47.7)                | 397 (47.7)      | 0.000                                 | 515 (44.1)                | 587 (50.3)       | 0.124                                 | 484 (49.0)                | 498 (50.4)      | 0.028                                 |
| Apgar score <7 at 5 min                                | 9 (1.1)                   | 16 (1.9)        | 0.043                                 | 11 (0.9)                  | 24 (2.1)         | 0.045                                 | 40 (4.1)                  | 29 (2.9)        | 0.056                                 |
| Intubation in delivery room                            | 81 (9.7)                  | 86 (10.3)       | 0.018                                 | 95 (8.1)                  | 159 (13.6)       | 0.127                                 | 132 (13.4)                | 121 (12.3)      | 0.033                                 |
| Mechanical ventilation treatment in 7 days after birth | 109 (13.0)                | 130 (15.6)      | 0.067                                 | 119 (10.2)                | 204 (17.5)       | 0.151                                 | 170 (17.2)                | 169 (17.1)      | 0.003                                 |
| Surfactant use                                         | 312 (37.5)                | 322 (38.7)      | 0.024                                 | 316 (27.1)                | 329 (28.2)       | 0.022                                 | 468 (47.4)                | 443 (44.8)      | 0.051                                 |
| Nitric oxide use                                       | 1 (0.1)                   | 0 (0.0)         | 0.022                                 | 1 (0.1)                   | 2 (0.2)          | 0.011                                 | 3 (0.3)                   | 3 (0.3)         | 0.000                                 |
| PDA medication                                         | 97 (11.6)                 | 101 (12.1)      | 0.015                                 | 127 (10.9)                | 171 (14.6)       | 0.108                                 | 118 (11.9)                | 104 (10.5)      | 0.044                                 |

|              |         |         |       |         |         |       |         |         |       |
|--------------|---------|---------|-------|---------|---------|-------|---------|---------|-------|
| PDA ligation | 2 (0.2) | 4 (0.5) | 0.040 | 2 (0.2) | 2 (0.2) | 0.000 | 5 (0.5) | 2 (0.2) | 0.052 |
|--------------|---------|---------|-------|---------|---------|-------|---------|---------|-------|

---

Abbreviations: SGA, Small-for-Gestational-Age; PDA, patent ductus arteriosus.

Three groups of infants were matched with each other with the closest propensity score on a 1:1 ratio by using the nearest neighbor greedy matching algorithm without replacement. The maximum distance between 2 matched infants (the caliper) was set to 0.2. Propensity score matching by GA, BW, SGA, sex, multiple pregnancy, maternal age, gestational diabetes, gestational hypertension or pre/eclampsia, antenatal corticosteroids use, magnesium sulfate use, Apgar score, intubation in delivery room, treatment with surfactant, NO, PDA requiring pharmacological treatment, and mechanical ventilation treatment in 7 days after birth.

**eTable 4.** Sensitivity Analysis of Different Durations of Early Antibiotic Exposure in the Propensity Score Matched Sample

| Outcomes                                        | Early Antibiotic Exposure, n (%) |                  | aOR (95% CI); Early Antibiotic Exposure, n (%) |               | aOR (95% CI); Early Antibiotic Exposure, n (%) |                          | aOR (95% CI); Model 2 <sup>b</sup> |                  |                          |
|-------------------------------------------------|----------------------------------|------------------|------------------------------------------------|---------------|------------------------------------------------|--------------------------|------------------------------------|------------------|--------------------------|
|                                                 | None (N=833)                     | 1-4 days (N=833) | 1-4 d VS None (N=1168)                         | None (N=1168) | 5-7 days (N=1168)                              | 5-7 d VS None (N=988)    | 1-4 days (N=988)                   | 5-7 days (N=988) | 5-7 d VS 1-4 d           |
| Moderate to severe BPD or death                 | 148 (17.8)                       | 124 (14.9)       | <b>0.70 (0.53, 0.94)</b>                       | 172 (14.7)    | 265 (22.7)                                     | <b>1.37 (1.09, 1.73)</b> | 166 (16.8)                         | 214 (21.7)       | <b>1.52 (1.19, 1.94)</b> |
| Moderate to severe BPD in survivors at 36wk PMA | 136 (16.7)                       | 112 (13.6)       | <b>0.70 (0.52, 0.95)</b>                       | 160 (14.0)    | 234 (20.5)                                     | <b>1.30 (1.03, 1.66)</b> | 148 (15.3)                         | 191 (19.8)       | <b>1.51 (1.17, 1.94)</b> |
| Death prior to 36wk PMA                         | 10 (1.2)                         | 12 (1.4)         | 0.87 (0.35, 2.17)                              | 10 (0.9)      | 29 (2.5)                                       | <b>2.15 (1.02, 4.54)</b> | 18 (1.8)                           | 21 (2.1)         | 1.48 (0.74, 2.94)        |
| Death before hospital discharge                 | 14 (1.7)                         | 13 (1.6)         | 0.65 (0.28, 1.50)                              | 14 (1.2)      | 37 (3.2)                                       | <b>1.99 (1.05, 3.78)</b> | 19 (1.9)                           | 26 (2.6)         | 1.72 (0.91, 3.27)        |

Abbreviations: PMA, postmenstrual age; BPD, bronchopulmonary dysplasia.

Propensity score model was used to analyze the association between the prolonged antibiotic exposure and adverse outcomes. aOR (95% CI) was presented.



**eTable 5.** Baseline Characteristics of Different Durations of Initial Antibiotic Therapy Groups (starting <72 hours of age) in the Propensity Score Matched Sample

| Variables                                              | Early Antibiotic Exposure |                 | Absolute standardized mean difference | Early Antibiotic Exposure |                  | Absolute standardized mean difference | Early Antibiotic Exposure |                 | Absolute standardized mean difference |
|--------------------------------------------------------|---------------------------|-----------------|---------------------------------------|---------------------------|------------------|---------------------------------------|---------------------------|-----------------|---------------------------------------|
|                                                        | None (N=686)              | 1-4days (N=686) |                                       | None (N=1168)             | 5-7days (N=1168) |                                       | 1-4days (N=792)           | 5-7days (N=792) |                                       |
| <b>Maternal characteristics, n(%)</b>                  |                           |                 |                                       |                           |                  |                                       |                           |                 |                                       |
| Maternal age ≥35 y                                     | 160 (23.3)                | 145 (21.1)      | 0.053                                 | 280 (24.0)                | 312 (26.7)       | 0.063                                 | 176 (22.2)                | 169 (21.3)      | 0.021                                 |
| Multiple pregnancy                                     | 223 (32.5)                | 237 (34.6)      | 0.043                                 | 372 (31.9)                | 372 (31.9)       | 0.000                                 | 274 (34.6)                | 261 (33.0)      | 0.034                                 |
| Gestational diabetes                                   | 138 (20.1)                | 146 (21.3)      | 0.029                                 | 218 (18.7)                | 289 (24.7)       | 0.153                                 | 161 (20.3)                | 162 (20.5)      | 0.003                                 |
| Antenatal corticosteroids                              | 578 (84.3)                | 593 (86.4)      | 0.062                                 | 973 (83.3)                | 892 (76.4)       | 0.171                                 | 675 (85.2)                | 676 (85.4)      | 0.004                                 |
| Gestational hypertension or Pre/eclampsia              | 327 (47.7)                | 316 (46.1)      | 0.032                                 | 618 (52.9)                | 565 (48.4)       | 0.091                                 | 340 (42.9)                | 327 (41.3)      | 0.033                                 |
| Magnesium sulfate during delivery admission            | 421 (61.4)                | 443 (64.6)      | 0.066                                 | 723 (61.9)                | 613 (52.5)       | 0.190                                 | 494 (62.4)                | 488 (61.6)      | 0.016                                 |
| <b>Neonatal characteristics, n(%)</b>                  |                           |                 |                                       |                           |                  |                                       |                           |                 |                                       |
| Birth weight                                           |                           |                 |                                       |                           |                  |                                       |                           |                 |                                       |
| <1000g                                                 | 50 (7.3)                  | 60 (8.8)        | 0.049                                 | 83 (7.1)                  | 131 (11.2)       | 0.118                                 | 77 (9.7)                  | 77 (9.7)        | 0.038                                 |
| ≥1000g                                                 | 636 (92.7)                | 629 (91.2)      |                                       | 1085 (92.9)               | 1037 (88.8)      |                                       | 715 (90.3)                | 724 (91.4)      |                                       |
| Gestational age, week                                  |                           |                 |                                       |                           |                  |                                       |                           |                 |                                       |
| <28                                                    | 24 (3.5)                  | 33 (4.8)        | 0.059                                 | 26 (2.2)                  | 66 (5.7)         | 0.152                                 | 41 (5.2)                  | 37 (4.7)        | 0.023                                 |
| ≥28                                                    | 662 (96.5)                | 653 (95.2)      |                                       | 1142 (97.8)               | 1102 (94.3)      |                                       | 751 (94.8)                | 755 (95.3)      |                                       |
| SGA                                                    | 208 (30.3)                | 198 (28.9)      | 0.033                                 | 483 (41.4)                | 454 (38.9)       | 0.056                                 | 209 (26.4)                | 205 (25.9)      | 0.011                                 |
| Male sex                                               | 321 (46.8)                | 321 (46.8)      | 0.000                                 | 515 (44.1)                | 539 (46.2)       | 0.041                                 | 377 (47.6)                | 397 (50.1)      | 0.051                                 |
| Apgar score <7 at 5 min                                | 9 (1.3)                   | 11 (1.6)        | 0.025                                 | 11 (0.9)                  | 16 (1.4)         | 0.018                                 | 30 (3.8)                  | 19 (2.4)        | 0.073                                 |
| Intubation in delivery room                            | 68 (9.9)                  | 81 (11.8)       | 0.055                                 | 95 (8.1)                  | 168 (14.4)       | 0.146                                 | 111 (14.0)                | 108 (13.6)      | 0.011                                 |
| Mechanical ventilation treatment in 7 days after birth | 86 (12.5)                 | 104 (15.2)      | 0.071                                 | 119 (10.2)                | 183 (15.7)       | 0.114                                 | 128 (16.2)                | 125 (15.8)      | 0.010                                 |
| Surfactant use                                         | 290 (42.3)                | 286 (41.7)      | 0.012                                 | 316 (27.1)                | 393 (33.7)       | 0.133                                 | 389 (49.1)                | 385 (48.6)      | 0.010                                 |
| Nitric oxide use                                       | 1 (0.2)                   | 2 (0.3)         | 0.024                                 | 1 (0.1)                   | 1 (0.1)          | 0.000                                 | 3 (0.4)                   | 3 (0.4)         | 0.000                                 |
| PDA medication                                         | 73 (10.6)                 | 79 (11.5)       | 0.028                                 | 127 (10.9)                | 170 (14.6)       | 0.106                                 | 87 (11.0)                 | 75 (9.5)        | 0.048                                 |

|              |         |         |       |         |         |       |         |         |       |
|--------------|---------|---------|-------|---------|---------|-------|---------|---------|-------|
| PDA ligation | 2 (0.3) | 5 (0.7) | 0.062 | 2 (0.2) | 2 (0.2) | 0.000 | 5 (0.6) | 0 (0.0) | 0.110 |
|--------------|---------|---------|-------|---------|---------|-------|---------|---------|-------|

---

Abbreviations: SGA, Small-for-Gestational-Age; PDA, patent ductus arteriosus.

Three groups of infants were matched with each other with the closest propensity score on a 1:1 ratio by using the nearest neighbor greedy matching algorithm without replacement. The maximum distance between 2 matched infants (the caliper) was set to 0.2. Propensity score matching by GA, BW, SGA, sex, multiple pregnancy, maternal age, gestational diabetes, gestational hypertension or pre/eclampsia, antenatal corticosteroids use, magnesium sulfate use, Apgar score, intubation in delivery room, treatment with surfactant, NO, PDA requiring pharmacological treatment, and mechanical ventilation treatment in 7 days after birth.

**eTable 6.** Sensitivity Analysis of Different Durations of Initial Antibiotic Therapy (starting <72 hours of age) in the Propensity Score Matched Sample

| Outcomes                                        | Early Antibiotic Exposure, n (%) |                  | aOR (95% CI); Model 2 <sup>b</sup> | Early Antibiotic Exposure, n (%) |                   | aOR (95% CI); Model 2 <sup>b</sup> | Early Antibiotic Exposure, n (%) |                  | aOR (95% CI); Model 2 <sup>b</sup> |
|-------------------------------------------------|----------------------------------|------------------|------------------------------------|----------------------------------|-------------------|------------------------------------|----------------------------------|------------------|------------------------------------|
|                                                 | None (N=686)                     | 1-4 days (N=686) | 1-4 d VS None                      | None (N=1168)                    | 5-7 days (N=1168) | 5-7 d VS None                      | 1-4 days (N=792)                 | 5-7 days (N=792) | 5-7 d VS 1-4 d                     |
| Moderate to severe BPD or death                 | 120 (17.5)                       | 105 (15.3)       | 0.74 (0.54, 1.02)                  | 172 (14.7)                       | 245 (21.0)        | <b>1.27 (1.00, 1.61)</b>           | 120 (15.2)                       | 166 (21.0)       | <b>1.70 (1.28, 2.26)</b>           |
| Moderate to severe BPD in survivors at 36wk PMA | 109 (16.3)                       | 96 (14.2)        | 0.74 (0.53, 1.03)                  | 160 (14.0)                       | 217 (19.0)        | 1.18 (0.92, 1.51)                  | 110 (14.1)                       | 146 (18.8)       | <b>1.61 (1.20, 2.16)</b>           |
| Death prior to 36wk PMA                         | 9 (1.3)                          | 9 (1.3)          | 0.92 (0.35, 2.42)                  | 10 (0.9)                         | 26 (2.2)          | <b>2.19 (1.03, 4.66)</b>           | 10 (1.3)                         | 17 (2.2)         | 2.03 (0.88, 4.71)                  |
| Death before hospital discharge                 | 13 (1.9)                         | 9 (1.3)          | 0.61 (0.25, 1.51)                  | 14 (1.2)                         | 33 (2.8)          | <b>1.95 (1.02, 3.72)</b>           | 10 (1.3)                         | 23 (2.9)         | <b>2.76 (1.25, 6.06)</b>           |

Abbreviations: PMA, postmenstrual age; BPD, bronchopulmonary dysplasia.

Propensity score model was used to analyze the association between the prolonged antibiotic exposure and adverse outcomes. aOR (95% CI) was presented.

**eTable 7.** Baseline Characteristics of Different Durations of Early Antibiotic Exposure in the Propensity Score Matched Sample with Imputation of Missing Data for Magnesium Sulfate During Delivery Admission

| Variables                                              | Early Antibiotic Exposure |                 | Absolute standardized mean difference | Early Antibiotic Exposure |                  | Absolute standardized mean difference | Early Antibiotic Exposure |                  | Absolute standardized mean difference |
|--------------------------------------------------------|---------------------------|-----------------|---------------------------------------|---------------------------|------------------|---------------------------------------|---------------------------|------------------|---------------------------------------|
|                                                        | None (N=919)              | 1-4days (N=919) |                                       | None (N=1250)             | 5-7days (N=1250) |                                       | 1-4days (N=1086)          | 5-7days (N=1086) |                                       |
| <b>Maternal characteristics, n(%)</b>                  |                           |                 |                                       |                           |                  |                                       |                           |                  |                                       |
| Maternal age $\geq$ 35 y                               | 213 (23.2)                | 220 (23.9)      | 0.019                                 | 302 (24.2)                | 398 (31.8)       | 0.175                                 | 235 (21.6)                | 241 (22.2)       | 0.013                                 |
| Multiple pregnancy                                     | 290 (31.6)                | 272 (29.6)      | 0.042                                 | 399 (31.9)                | 366 (29.3)       | 0.060                                 | 374 (32.0)                | 335 (30.9)       | 0.024                                 |
| Gestational diabetes                                   | 183 (19.9)                | 168 (18.3)      | 0.042                                 | 231 (18.5)                | 263 (21.0)       | 0.065                                 | 204 (18.8)                | 189 (17.4)       | 0.035                                 |
| Antenatal corticosteroids                              | 757 (82.4)                | 732 (79.7)      | 0.069                                 | 1016 (81.3)               | 981 (78.5)       | 0.065                                 | 880 (81.0)                | 883 (81.3)       | 0.007                                 |
| Gestational hypertension or Pre/eclampsia              | 435 (47.3)                | 411 (44.7)      | 0.053                                 | 660 (52.8)                | 636 (50.9)       | 0.038                                 | 483 (44.5)                | 473 (43.6)       | 0.019                                 |
| Magnesium sulfate during delivery admission            | 509 (55.4)                | 500 (54.4)      | 0.020                                 | 723 (57.8)                | 629 (50.3)       | 0.150                                 | 605 (55.7)                | 582 (53.6)       | 0.043                                 |
| <b>Neonatal characteristics, n(%)</b>                  |                           |                 |                                       |                           |                  |                                       |                           |                  |                                       |
| Birth weight                                           |                           |                 |                                       |                           |                  |                                       |                           |                  |                                       |
| <1000g                                                 | 77 (8.4)                  | 90 (9.8)        | 0.047                                 | 91 (7.3)                  | 181 (14.5)       | 0.206                                 | 112 (10.3)                | 81 (7.5)         | 0.094                                 |
| $\geq$ 1000g                                           | 842 (91.6)                | 829 (90.2)      |                                       | 1159 (92.7)               | 1069 (85.5)      |                                       | 974 (89.7)                | 1005 (92.5)      |                                       |
| Gestational age, week                                  |                           |                 |                                       |                           |                  |                                       |                           |                  |                                       |
| <28                                                    | 28 (3.1)                  | 33 (3.6)        | 0.025                                 | 30 (2.4)                  | 63 (5.0)         | 0.117                                 | 51 (4.7)                  | 35 (3.2)         | 0.069                                 |
| $\geq$ 28                                              | 891 (96.9)                | 886 (96.4)      |                                       | 1220 (97.6)               | 1187 (95.0)      |                                       | 1035 (95.3)               | 1051 (96.8)      |                                       |
| SGA                                                    | 312 (34.0)                | 305 (33.2)      | 0.017                                 | 517 (41.4)                | 517 (41.4)       | 0.000                                 | 328 (30.2)                | 306 (28.2)       | 0.044                                 |
| Male sex                                               | 442 (48.1)                | 442 (48.1)      | 0.000                                 | 564 (45.1)                | 588 (47.0)       | 0.039                                 | 531 (48.9)                | 531 (48.9)       | 0.000                                 |
| Apgar score <7 at 5 min                                | 12 (1.3)                  | 17 (1.9)        | 0.027                                 | 15 (1.2)                  | 41 (3.3)         | 0.082                                 | 46 (4.2)                  | 36 (3.3)         | 0.046                                 |
| Intubation in delivery room                            | 91 (9.9)                  | 113 (12.3)      | 0.01                                  | 109 (8.7)                 | 183 (14.6)       | 0.137                                 | 144 (13.3)                | 144 (13.3)       | 0.000                                 |
| Mechanical ventilation treatment in 7 days after birth | 119 (13.0)                | 149 (16.2)      | 0.085                                 | 131 (10.5)                | 175 (14.0)       | 0.073                                 | 193 (17.8)                | 188 (17.3)       | 0.012                                 |
| Surfactant use                                         | 328 (35.7)                | 347 (37.8)      | 0.041                                 | 333 (26.6)                | 389 (31.1)       | 0.090                                 | 504 (46.4)                | 511 (47.1)       | 0.013                                 |
| Nitric oxide use                                       | 1 (0.1)                   | 0 (0.0)         | 0.018                                 | 1 (0.1)                   | 4 (0.3)          | 0.030                                 | 4 (0.4)                   | 0 (0.0)          | 0.061                                 |
| PDA medication                                         | 111 (12.8)                | 108 (11.8)      | 0.010                                 | 133 (10.6)                | 178 (14.2)       | 0.103                                 | 130 (12.0)                | 104 (9.6)        | 0.074                                 |

PDA ligation 2 (0.2) 4 (0.4) 0.038 3 (0.2) 2 (0.2) 0.018 5 (0.5) 1 (0.1) 0.071

Abbreviations: PMA, postmenstrual age; BPD, bronchopulmonary dysplasia.

Three groups of infants were matched with each other with the closest propensity score on a 1:1 ratio by using the nearest neighbor greedy matching algorithm without replacement. The maximum distance between 2 matched infants (the caliper) was set to 0.2. Propensity score matching by GA, BW, SGA, sex, multiple pregnancy, maternal age, gestational diabetes, gestational hypertension or pre/eclampsia, antenatal corticosteroids use, magnesium sulfate use, Apgar score, intubation in delivery room, treatment with surfactant, NO, PDA requiring pharmacological treatment, and mechanical ventilation treatment in 7 days after birth.

**eTable 8.** Sensitivity Analysis of Different Durations of Early Antibiotic Exposure in the Propensity Score Matched Sample with Imputation of Missing Data for Magnesium Sulfate During Delivery Admission

| Outcomes                                        | Early Antibiotic Exposure, n (%) |            | aOR (95% CI); Early Antibiotic Exposure, n (%) |            | aOR (95% CI); Early Antibiotic Exposure, n (%) |                          | aOR (95% CI); Early Antibiotic Exposure, n (%) |            |                          |
|-------------------------------------------------|----------------------------------|------------|------------------------------------------------|------------|------------------------------------------------|--------------------------|------------------------------------------------|------------|--------------------------|
|                                                 | None                             | 1-4 days   | None                                           | 5-7 days   | None                                           | 1-4 days                 | 5-7 days                                       | None       |                          |
|                                                 | (N=919)                          | (N=919)    | 1-4 d VS None                                  | (N=1250)   | (N=1250)                                       | 5-7 d VS None            | (N=1086)                                       | (N=1086)   | 5-7 d VS 1-4 d           |
| Moderate to severe BPD or death                 | 156 (17.0)                       | 146 (15.9) | 0.83 (0.63, 1.09)                              | 190 (15.2) | 267 (21.4)                                     | <b>1.29 (1.03, 1.61)</b> | 188 (17.3)                                     | 234 (21.6) | <b>1.48 (1.18, 1.87)</b> |
| Moderate to severe BPD in survivors at 36wk PMA | 143 (16.0)                       | 132 (14.6) | 0.82 (0.62, 1.09)                              | 176 (14.5) | 237 (19.4)                                     | 1.22 (0.97, 1.54)        | 169 (15.8)                                     | 212 (19.9) | <b>1.48 (1.17, 1.89)</b> |
| Death prior to 36wk PMA                         | 10 (1.1)                         | 14 (1.5)   | 1.18 (0.51, 2.76)                              | 11 (0.9)   | 28 (2.2)                                       | 2.01 (0.97, 4.17)        | 19 (1.8)                                       | 21 (1.9)   | 1.37 (0.70, 2.70)        |
| Death before hospital discharge                 | 16 (1.7)                         | 16 (1.7)   | 0.84 (0.40, 1.75)                              | 17 (1.4)   | 36 (2.9)                                       | 1.66 (0.91, 3.05)        | 21 (1.9)                                       | 27 (2.5)   | 1.61 (0.86, 2.99)        |

Abbreviations: PMA, postmenstrual age; BPD, bronchopulmonary dysplasia.

Propensity score model was used to analyze the association between the prolonged antibiotic exposure and adverse outcomes. aOR (95% CI) was presented.

**eTable 9.** Baseline Characteristics of Participants in the Top 14 Centers that Implemented Relatively Stricter Criteria for Antibiotic Therapy

| Variables                                              | Early Antibiotic Exposure |                  |                  | <i>P</i> |
|--------------------------------------------------------|---------------------------|------------------|------------------|----------|
|                                                        | None (N=912)              | 1-4 days (N=511) | 5-7 days (N=682) |          |
| <b>Maternal characteristics, n/N (%)</b>               |                           |                  |                  |          |
| Maternal age ≥35 y                                     | 229/908 (25.2)            | 104/509 (20.4)   | 186/676 (27.5)   | 0.019    |
| Multiple pregnancy                                     | 308/912 (33.8)            | 158/511 (30.9)   | 198/682 (29.0)   | 0.124    |
| Gestational diabetes                                   | 172/912 (18.9)            | 90/511 (17.6)    | 87/682 (12.8)    | 0.004    |
| Antenatal corticosteroids                              | 760/912 (83.3)            | 423/511 (82.8)   | 542/682 (79.5)   | 0.120    |
| Gestational hypertension or Pre/eclampsia              | 483/912 (53.0)            | 249/511 (48.7)   | 353/682 (51.8)   | 0.306    |
| Magnesium sulfate during delivery admission            | 566/874 (64.8)            | 325/481 (67.6)   | 428/632 (67.7)   | 0.398    |
| <b>Neonatal characteristics, n/N (%)</b>               |                           |                  |                  |          |
| Birth weight                                           |                           |                  |                  |          |
| <1000g                                                 | 77/912 (8.44)             | 67/511 (13.1)    | 137/682 (20.1)   | <0.001   |
| ≥1000g                                                 | 835/912 (91.6)            | 444/511 (86.9)   | 545/682 (79.9)   |          |
| Gestational age, week                                  |                           |                  |                  |          |
| <28                                                    | 30/912 (3.3)              | 39/511 (7.6)     | 60/682 (8.8)     | <0.001   |
| ≥28                                                    | 882/912 (96.7)            | 472/511 (92.4)   | 622/682 (91.2)   |          |
| SGA                                                    | 333/912 (36.5)            | 139/511 (27.2)   | 163/682 (23.9)   | <0.001   |
| Male sex                                               | 430/912 (47.2)            | 247/511 (48.3)   | 396/682 (58.1)   | <0.001   |
| Apgar score <7 at 5 min                                | 14/854 (1.6)              | 22/478 (4.6)     | 49/617 (7.9)     | <0.001   |
| Intubation in delivery room                            | 116/912 (12.7)            | 82/511 (16.1)    | 171/682 (25.1)   | <0.001   |
| Mechanical ventilation treatment in 7 days after birth | 133/912 (14.6)            | 108/511 (21.1)   | 280/682 (41.1)   | <0.001   |
| Surfactant use                                         | 271/912 (29.7)            | 245/511 (48.0)   | 394/682 (57.8)   | <0.001   |
| Nitric oxide use                                       | 1/912 (0.1)               | 3/511 (0.6)      | 3/682 (0.4)      | 0.204    |
| PDA medication                                         | 128/912 (14.0)            | 81/511 (15.9)    | 108/682 (15.8)   | 0.517    |
| PDA ligation                                           | 2/912 (0.2)               | 5/511 (1.0)      | 1/682 (0.2)      | 0.069    |

Abbreviations: SGA, Small-for-Gestational-Age; PDA, patent ductus arteriosus.

**eTable 10.** Sensitivity Analysis According to the Proportion of Infants with Prolonged Antibiotic Exposure

| Outcomes                                        | Center cluster 1                   |                | 5-7 d VS None<br>aOR (95% CI)<br>in Model 2 |
|-------------------------------------------------|------------------------------------|----------------|---------------------------------------------|
|                                                 | Early Antibiotic Exposure, n/N (%) |                |                                             |
|                                                 | None (N=912)                       | 5-7 d (N=682)  |                                             |
| Moderate to severe BPD or death                 | 162/912 (17.8)                     | 273/682 (40.0) | <b>1.66 (1.25, 2.22)</b>                    |
| Moderate to severe BPD in survivors at 36wk PMA | 152/881 (17.3)                     | 245/655 (37.4) | <b>1.56 (1.16, 2.10)</b>                    |
| Death prior to 36wk PMA                         | 9/912 (1.0)                        | 27/682 (4.0)   | <b>2.78 (1.11, 6.95)</b>                    |
| Death before hospital discharge                 | 13/912 (1.4)                       | 30/682 (4.4)   | <b>2.26 (1.01, 5.06)</b>                    |

Abbreviations: PMA, postmenstrual age; BPD, bronchopulmonary dysplasia.

Center cluster 1: The top 14 centers that implemented relatively stricter criteria for antibiotic therapy.

Logistic regression model 2 was used to analyze the association between the prolonged antibiotic exposure and adverse outcomes. In model 2, GA, BW, SGA, sex, multiple pregnancy, maternal age, gestational diabetes, gestational hypertension or pre/eclampsia, antenatal corticosteroids use, magnesium sulfate use, Apgar score, intubation in delivery room, treatment with surfactant, NO, PDA requiring pharmacological treatment, and mechanical ventilation treatment in 7 days after birth were adjusted. aOR (95% CI) was presented.

**eFigure 4.** Stratified Analysis for Effects of Broad-spectrum or Narrow-spectrum Antibiotics Varied by the Duration of Antibiotics Exposure

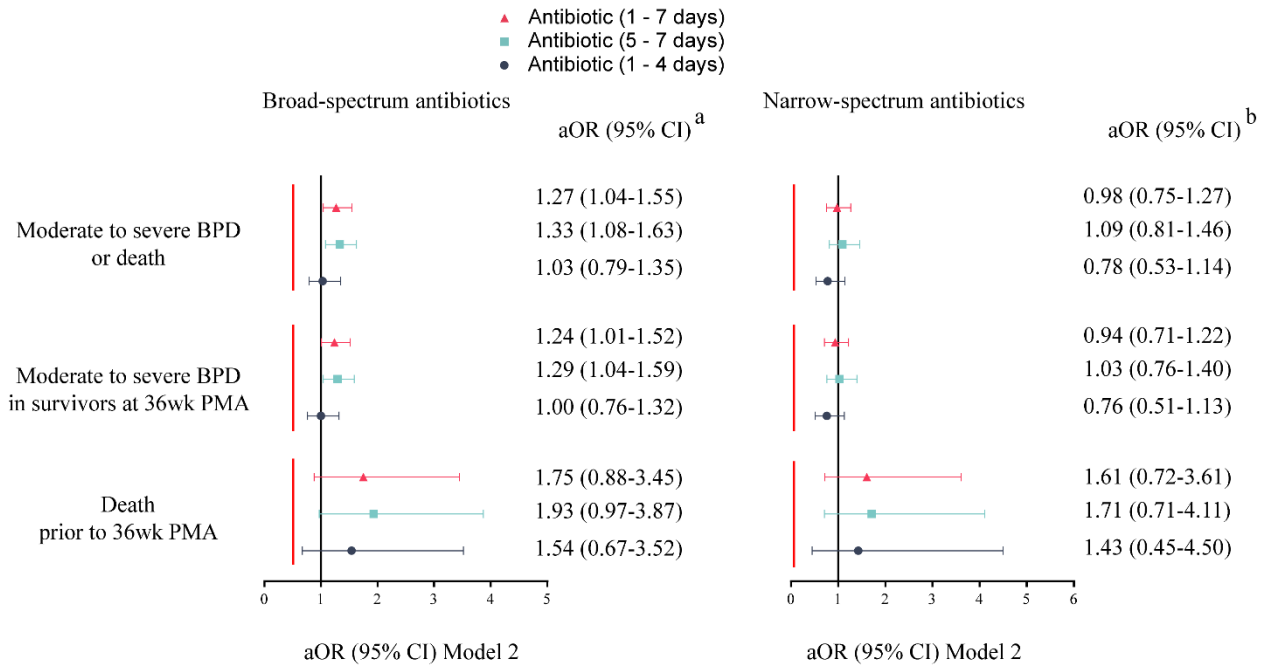

Abbreviations: PMA, postmenstrual age; BPD, bronchopulmonary dysplasia.

Logistic regression model 2 was used to analyze the association between the different durations of antibiotic exposure (1-4 days, 5-7 days, and 1-7 days) and adverse outcomes. Reference is none antibiotic exposure. In model 2, GA, BW, SGA, sex, multiple pregnancy, maternal age, gestational diabetes, gestational hypertension or pre/eclampsia, antenatal corticosteroids use, magnesium sulfate use, Apgar score, intubation in delivery room, treatment with surfactant, NO, PDA requiring pharmacological treatment, and mechanical ventilation treatment in 7 days after birth were adjusted. aOR (95% CI) was presented.

<sup>a</sup> Broad-spectrum antibiotic exposure group.

<sup>b</sup> Narrow-spectrum antibiotic exposure group.
