# Supplementary material for: Early Antibiotic Exposure and Bronchopulmonary Dysplasia in Very Preterm Infants at Low Risk of Early-Onset Sepsis
Source: PubMed Central journal article supplement (PMC11211957; doi:10.1001/jamanetworkopen.2024.18831), 2024-06-27
Supplement: jamanetwopen-e2418831-s002.pdf [file jamanetwopen-e2418831-s002.pdf]

\*First name, last name, and suffix (if applicable) are required and will appear in PubMed.

| <b>*Group Name(s): Chinese Neonatal Network</b> |                   |                              |                  |                                                                    |                                          |                                                         |                                                                                            |
|-------------------------------------------------|-------------------|------------------------------|------------------|--------------------------------------------------------------------|------------------------------------------|---------------------------------------------------------|--------------------------------------------------------------------------------------------|
| <b>*First Name and Middle Initial(s)</b>        | <b>*Last Name</b> | <b>*Suffix (eg, Jr, III)</b> | Academic Degrees | Institution                                                        | Location (city, state/province, country) | Role or Contribution, eg, chair, principal investigator | Group (if more than 1 Group listed in the byline) and/or Subgroup (eg, Steering Committee) |
| Chao                                            | Chen              |                              | MD               | Children's Hospital of Fudan University                            |                                          |                                                         |                                                                                            |
| Yun                                             | Cao               |                              | MD               | Children's Hospital of Fudan University                            |                                          |                                                         |                                                                                            |
| Xiuyong                                         | Chen              |                              | MD               | The Third Affiliated Hospital of Zhengzhou University              |                                          |                                                         |                                                                                            |
| Huyan                                           | Zhang             |                              | MD               | Guangzhou Women and Children's Medical Center                      |                                          |                                                         |                                                                                            |
| Xiuying                                         | Tian              |                              | MD               | Tianjin Obstetrics & Gynecology Hospital                           |                                          |                                                         |                                                                                            |
| Jingyun                                         | Shi               |                              | MD               | Gansu Provincial Maternity and Child Care Hospital                 |                                          |                                                         |                                                                                            |
| Zhankui                                         | Li                |                              | MD               | Northwest Women's and Children's Hospital                          |                                          |                                                         |                                                                                            |
| Chuanzhong                                      | Yang              |                              | MD               | Shenzhen Maternity and Child Health Care Hospital                  |                                          |                                                         |                                                                                            |
| Ling                                            | Liu               |                              | MD               | Guizhou Women and Children's Hospital                              |                                          |                                                         |                                                                                            |
| Zuming                                          | Yang              |                              | MD               | Suzhou Municipal Hospital affiliated to Nanjing Medical University |                                          |                                                         |                                                                                            |
| Jianhua                                         | Fu                |                              | MD               | Shengjing Hospital of China Medical University                     |                                          |                                                         |                                                                                            |
| Yong                                            | Ji                |                              | MD               | Children's Hospital of Shanxi                                      |                                          |                                                         |                                                                                            |
| Dongmei                                         | Chen              |                              | MD               | Quanzhou Women and Children's Hospital                             |                                          |                                                         |                                                                                            |
| Changyi                                         | Yang              |                              | MD               | Fujian Women and Children's Medical Center                         |                                          |                                                         |                                                                                            |
| Rui                                             | Chen              |                              | MD               | Children's Hospital of Nanjing Medical University                  |                                          |                                                         |                                                                                            |
| Xiaoming                                        | Peng              |                              | MD               | Hunan Children's Hospital                                          |                                          |                                                         |                                                                                            |
| Ruobing                                         | Shan              |                              | MD               | Qingdao Women and Children's Hospital                              |                                          |                                                         |                                                                                            |
| Shuping                                         | Han               |                              | MD               | Nanjing Maternity and Child Health Care Hospital                   |                                          |                                                         |                                                                                            |
| Hui                                             | Wu                |                              | MD               | The First Bethune Hospital of Jilin University                     |                                          |                                                         |                                                                                            |
| Lili                                            | Wang              |                              | MD               | The First Affiliated Hospital of Anhui Medical University          |                                          |                                                         |                                                                                            |
| Qiufen                                          | Wei               |                              | MD               | Women and Children's Hospital of Guangxi Zhuang Autonomous Region  |                                          |                                                         |                                                                                            |
| Mingxia                                         | Li                |                              | MD               | The First Affiliated Hospital of Xinjiang Medical University       |                                          |                                                         |                                                                                            |
| Yiheng                                          | Dai               |                              | MD               | Foshan Women and Children's Hospital                               |                                          |                                                         |                                                                                            |
| Hong                                            | Jiang             |                              | MD               | The Affiliated Hospital of Qingdao University                      |                                          |                                                         |                                                                                            |
| Wenqing                                         | Kang              |                              | MD               | Henan Children's Hospital                                          |                                          |                                                         |                                                                                            |
| Xiaohui                                         | Gong              |                              | MD               | Children's Hospital of Shanghai                                    |                                          |                                                         |                                                                                            |
| Xiaoyun                                         | Zhong             |                              | MD               | Chongqing Health Care Center for Women and Children                |                                          |                                                         |                                                                                            |
| Yuan                                            | Shi               |                              | MD               | Children's Hospital of Chongqing Medical University                |                                          |                                                         |                                                                                            |

## Supplemental Online Content: Nonauthor Collaborators

\*First name, last name, and suffix (if applicable) are required and will appear in PubMed.

| *First Name and Middle Initial(s) | *Last Name | *Suffix (eg, Jr, III) | Academic Degrees | Institution                                                                                      | Location (city, state/province, country) | Role or Contribution, eg, chair, principal investigator | Group (if more than 1 Group listed in the byline) and/or Subgroup (eg, Steering Committee) |
|-----------------------------------|------------|-----------------------|------------------|--------------------------------------------------------------------------------------------------|------------------------------------------|---------------------------------------------------------|--------------------------------------------------------------------------------------------|
| Shanyu                            | Jiang      |                       | MD               | Wuxi Maternity and Child Healthcare Hospital                                                     |                                          |                                                         |                                                                                            |
| Bing                              | Sun        |                       | MD               | Children's Hospital of Soochow University                                                        |                                          |                                                         |                                                                                            |
| Long                              | Li         |                       | MD               | People's Hospital of Xinjiang Uygur Autonomous Region                                            |                                          |                                                         |                                                                                            |
| Zhenlang                          | Lin        |                       | MD               | Yuying Children's Hospital Affiliated to Wenzhou Medical University                              |                                          |                                                         |                                                                                            |
| Jiangqin                          | Liu        |                       | MD               | Shanghai First Maternity and Infant Hospital                                                     |                                          |                                                         |                                                                                            |
| Jiahua                            | Pan        |                       | MD               | Anhui Provincial Hospital                                                                        |                                          |                                                         |                                                                                            |
| Hongping                          | Xia        |                       | MD               | Xinhua Hospital affiliated to Shanghai Jiaotong University School of Medicine                    |                                          |                                                         |                                                                                            |
| Xiaoying                          | Li         |                       | MD               | Qilu Children's Hospital of Shandong University                                                  |                                          |                                                         |                                                                                            |
| Falin                             | Xu         |                       | MD               | The First Affiliated Hospital of Zhengzhou University                                            |                                          |                                                         |                                                                                            |
| Yinping                           | Qiu        |                       | MD               | General Hospital of Ningxia Medical University                                                   |                                          |                                                         |                                                                                            |
| Li                                | Ma         |                       | MD               | Hebei Children's Hospital                                                                        |                                          |                                                         |                                                                                            |
| Ling                              | Yang       |                       | MD               | Hainan Women and Children's Hospital                                                             |                                          |                                                         |                                                                                            |
| Xiaori                            | He         |                       | MD               | The second XiangYA hospital of Central South University                                          |                                          |                                                         |                                                                                            |
| Yanhong                           | Li         |                       | MD               | Ningbo Women&Children Hospital                                                                   |                                          |                                                         |                                                                                            |
| Deyi                              | Zhuang     |                       | MD               | Xiamen Children's Hospital                                                                       |                                          |                                                         |                                                                                            |
| Qin                               | Zhang      |                       | MD               | Shaanxi Provincial People's Hospital                                                             |                                          |                                                         |                                                                                            |
| Wenbin                            | Dong       |                       | MD               | The Affiliated Hospital of Southwest Medical University                                          |                                          |                                                         |                                                                                            |
| Jianhua                           | Sun        |                       | MD               | Shanghai Children's Medical Center affiliated to Shanghai Jiaotong University School of Medicine |                                          |                                                         |                                                                                            |
| Kun                               | Liang      |                       | MD               | First Affiliated Hospital of Kunming Medical University                                          |                                          |                                                         |                                                                                            |
| Huaiyan                           | Wang       |                       | MD               | Changzhou Maternal and Children Health Care Hospital                                             |                                          |                                                         |                                                                                            |
| Jinxing                           | Feng       |                       | MD               | Shenzhen Children's Hospital                                                                     |                                          |                                                         |                                                                                            |
| Liping                            | Chen       |                       | MD               | Jiangxi Provincial Children's Hospital                                                           |                                          |                                                         |                                                                                            |
| Xinzhu                            | Lin        |                       | MD               | Xiamen Maternity and Child Health Care Hospital                                                  |                                          |                                                         |                                                                                            |
| Chunming                          | Jiang      |                       | MD               | Zhuhai Center for Maternal and Child Health Care                                                 |                                          |                                                         |                                                                                            |
| Chuan                             | Nie        |                       | MD               | Guangdong Women and Children's Hospital                                                          |                                          |                                                         |                                                                                            |
| Linkong                           | Zeng       |                       | MD               | Wuhan Children's Hospital                                                                        |                                          |                                                         |                                                                                            |
| Mingyan                           | Hei        |                       | MD               | Beijing Children's Hospital of Capital Medical University                                        |                                          |                                                         |                                                                                            |
| Hongdan                           | Zhu        |                       | MD               | Maternal and Children Hospital of Shaoxing                                                       |                                          |                                                         |                                                                                            |
| Hongying                          | Mi         |                       | MD               | The First People's Hospital of Yunnan Province                                                   |                                          |                                                         |                                                                                            |
| Zhaoqing                          | Yin        |                       | MD               | Dehong people's Hospital of Yunnan Province                                                      |                                          |                                                         |                                                                                            |
| Hongxia                           | Song       |                       | MD               | First Affiliated Hospital of Xian Jiaotong University                                            |                                          |                                                         |                                                                                            |

## Supplemental Online Content: Nonauthor Collaborators

\*First name, last name, and suffix (if applicable) are required and will appear in PubMed.

| *First Name and Middle Initial(s) | *Last Name | *Suffix (eg, Jr, III) | Academic Degrees | Institution                                                                          | Location (city, state/province, country) | Role or Contribution, eg, chair, principal investigator | Group (if more than 1 Group listed in the byline) and/or Subgroup (eg, Steering Committee) |
|-----------------------------------|------------|-----------------------|------------------|--------------------------------------------------------------------------------------|------------------------------------------|---------------------------------------------------------|--------------------------------------------------------------------------------------------|
| Hongyun                           | Wang       |                       | MD               | Inner Mongolia maternal and child health care hospital                               |                                          |                                                         |                                                                                            |
| Dong                              | Li         |                       | MD               | Dalian Municipal Women and Children's Medical Center                                 |                                          |                                                         |                                                                                            |
| Yan                               | Gao        |                       | MD               | Lianyungang Maternal and Children Health Hospital                                    |                                          |                                                         |                                                                                            |
| Yajuan                            | Wang       |                       | MD               | Children's Hospital Affiliated to Capital Institute of Pediatrics                    |                                          |                                                         |                                                                                            |
| Liyang                            | Dai        |                       | MD               | Anhui Children's Hoospital                                                           |                                          |                                                         |                                                                                            |
| Liyan                             | Zhang      |                       | MD               | Fuzhou Children's Hospital of Fujian Province                                        |                                          |                                                         |                                                                                            |
| Yangfang                          | Li         |                       | MD               | Kunming Children's Hospital                                                          |                                          |                                                         |                                                                                            |
| Qianshen                          | Zhang      |                       | MD               | Shenzhen Hospital of Hongkong University                                             |                                          |                                                         |                                                                                            |
| Guofang                           | Ding       |                       | MD               | Peking Union Medical College Hospital                                                |                                          |                                                         |                                                                                            |
| Jimei                             | Wang       |                       | MD               | Obstetrics & Gynecology Hospital of Fudan University                                 |                                          |                                                         |                                                                                            |
| Xiaoxia                           | Chen       |                       | MD               | The Affiliated Hospital of Guizhou Medical University                                |                                          |                                                         |                                                                                            |
| Zhen                              | Wang       |                       | MD               | Qinghai Women and Children Hospital                                                  |                                          |                                                         |                                                                                            |
| Zheng                             | Tang       |                       | MD               | The International Peace Maternity & Child Health Hospital of China welfare institute |                                          |                                                         |                                                                                            |
| Xiaomei                           | Zhang      |                       | MD               | Inner Mongolia People's Hospital                                                     |                                          |                                                         |                                                                                            |
| Xiaolan                           | Zhang      |                       | MD               | Xiamen Humanity Hospital                                                             |                                          |                                                         |                                                                                            |
| Fang                              | Wu         |                       | MD               | Shanghai General Hospital                                                            |                                          |                                                         |                                                                                            |
| Yanxiang                          | Chen       |                       | MD               | The First People's Hospital of Yinchuan                                              |                                          |                                                         |                                                                                            |
| Ying                              | Wu         |                       | MD               | The Third Hospital of Nanchang                                                       |                                          |                                                         |                                                                                            |
| Joseph                            | Ting       |                       | MBBS             | University of Alber                                                                  |                                          |                                                         |                                                                                            |
