# Supplementary material for: Early Antibiotic Exposure and Bronchopulmonary Dysplasia in Very Preterm Infants at Low Risk of Early-Onset Sepsis
Source: PubMed Central journal article supplement (PMC11211957; doi:10.1001/jamanetworkopen.2024.18831), 2024-06-27
Supplement: jamanetwopen-e2418831-s003.pdf [file jamanetwopen-e2418831-s003.pdf]

## Data Sharing Statement

Shi. Early Antibiotic Exposure and Bronchopulmonary Dysplasia in Very Preterm Infants at Low Risk of Early-Onset Sepsis. *JAMA Netw Open*. Published June 27, 2024.  
doi:10.1001/jamanetworkopen.2024.18831

### Data

**Data available:** No
